# Supplementary material for: Encephalitis as a Clinical Manifestation of COVID-19: A Case Series
Source: PubMed Central journal article supplement — Case Rep Neurol. 2023 Jun 15;15(1):131–9. doi: 10.1159/000530926 (PMC10359675; doi:10.1159/000530926), 2023-06-15
Supplement: Supplementary_material-Suppl.1-s1.pdf [file Supplementary_material-Suppl.1-s1.pdf]

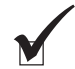

| Topic                               | Item       | Checklist item description                                                                             | Reported on Line                                                    |
|-------------------------------------|------------|--------------------------------------------------------------------------------------------------------|---------------------------------------------------------------------|
| <b>Title</b>                        | <b>1</b>   | The diagnosis or intervention of primary focus followed by the words “case report”                     | yes                                                                 |
| <b>Key Words</b>                    | <b>2</b>   | 2 to 5 key words that identify diagnoses or interventions in this case report, including "case report" | yes                                                                 |
| <b>Abstract<br/>(no references)</b> | <b>3a</b>  | Introduction: What is unique about this case and what does it add to the scientific literature?        | yes                                                                 |
|                                     | <b>3b</b>  | Main symptoms and/or important clinical findings                                                       | yes                                                                 |
|                                     | <b>3c</b>  | The main diagnoses, therapeutic interventions, and outcomes                                            | yes                                                                 |
|                                     | <b>3d</b>  | Conclusion—What is the main “take-away” lesson(s) from this case?                                      | yes                                                                 |
| <b>Introduction</b>                 | <b>4</b>   | One or two paragraphs summarizing why this case is unique ( <b>may include references</b> )            | yes                                                                 |
| <b>Patient Information</b>          | <b>5a</b>  | De-identified patient specific information.                                                            | yes                                                                 |
|                                     | <b>5b</b>  | Primary concerns and symptoms of the patient.                                                          | yes                                                                 |
|                                     | <b>5c</b>  | Medical, family, and psycho-social history including relevant genetic information                      | yes                                                                 |
|                                     | <b>5d</b>  | Relevant past interventions with outcomes                                                              | yes                                                                 |
| <b>Clinical Findings</b>            | <b>6</b>   | Describe significant physical examination (PE) and important clinical findings.                        | yes                                                                 |
| <b>Timeline</b>                     | <b>7</b>   | Historical and current information from this episode of care organized as a timeline                   | yes                                                                 |
| <b>Diagnostic Assessment</b>        | <b>8a</b>  | Diagnostic testing (such as PE, laboratory testing, imaging, surveys).                                 | yes                                                                 |
|                                     | <b>8b</b>  | Diagnostic challenges (such as access to testing, financial, or cultural)                              | yes                                                                 |
|                                     | <b>8c</b>  | Diagnosis (including other diagnoses considered)                                                       | yes                                                                 |
|                                     | <b>8d</b>  | Prognosis (such as staging in oncology) where applicable                                               | yes                                                                 |
| <b>Therapeutic Intervention</b>     | <b>9a</b>  | Types of therapeutic intervention (such as pharmacologic, surgical, preventive, self-care)             | yes                                                                 |
|                                     | <b>9b</b>  | Administration of therapeutic intervention (such as dosage, strength, duration)                        | yes                                                                 |
|                                     | <b>9c</b>  | Changes in therapeutic intervention (with rationale)                                                   | yes                                                                 |
| <b>Follow-up and Outcomes</b>       | <b>10a</b> | Clinician and patient-assessed outcomes (if available)                                                 | yes                                                                 |
|                                     | <b>10b</b> | Important follow-up diagnostic and other test results                                                  | yes                                                                 |
|                                     | <b>10c</b> | Intervention adherence and tolerability (How was this assessed?)                                       | yes                                                                 |
|                                     | <b>10d</b> | Adverse and unanticipated events                                                                       | yes                                                                 |
| <b>Discussion</b>                   | <b>11a</b> | A scientific discussion of the strengths AND limitations associated with this case report              | yes                                                                 |
|                                     | <b>11b</b> | Discussion of the relevant medical literature <b>with references</b> .                                 | yes                                                                 |
|                                     | <b>11c</b> | The scientific rationale for any conclusions (including assessment of possible causes)                 | yes                                                                 |
|                                     | <b>11d</b> | The primary “take-away” lessons of this case report (without references) in a one paragraph conclusion | yes                                                                 |
| <b>Patient Perspective</b>          | <b>12</b>  | The patient should share their perspective in one to two paragraphs on the treatment(s) they received  | yes                                                                 |
| <b>Informed Consent</b>             | <b>13</b>  | Did the patient give informed consent? Please provide if requested                                     | Yes <input checked="" type="checkbox"/> No <input type="checkbox"/> |
